# Supplementary material for: Safety and Effectiveness of Molnupiravir (LAGEVRIO®) Capsules in Japanese Patients with COVID-19: Interim Report of Post-marketing Surveillance in Japan
Source: Springer Nature journal article supplement (doi:10.1007/s40121-023-00782-5), 2023-03-16
Supplement: MOESM1 [file 24631810]

**Title:** Safety and effectiveness of Molnupiravir (LAGEVRIO<sup>®</sup>) capsules in Japanese patients with COVID-19: Interim Report of Post-marketing Surveillance in Japan

---

**Authors:**

Masahiro Kimata<sup>a</sup>, Asuka Watanabe<sup>b</sup>, Yukiko Yanagida<sup>a</sup>, Daisuke Kinoshita<sup>b</sup>, Shinichiroh Maekawa<sup>b</sup>

**Affiliation:**

<sup>a</sup> Medical Affairs MSD K.K., Kitanomaru Square, 1-13-12 Kudan-kita, Chiyoda-ku, Tokyo 102-8667, JAPAN

<sup>b</sup> Pharmacovigilance MSD K.K., Kitanomaru Square, 1-13-12 Kudan-kita, Chiyoda-ku, Tokyo 102-8667, JAPAN

**Corresponding author:**

Masahiro Kimata

Affiliation: Medical Affairs MSD K.K., Tokyo, Japan

Full postal address: Kitanomaru Square, 1-13-12 Kudan-kita, Chiyoda-ku, Tokyo 102-8667, JAPAN

Telephone/Fax: +81-3-6272-2043/+81-3-6238-9055

Email address: [masahiro.kimata@merck.com](mailto:masahiro.kimata@merck.com)

---

Table S1. Severity level defined by the Clinical Management of Patients with COVID-19[13]

| Severity                                                           | Oxygen saturation level | Clinical state                                                |
|--------------------------------------------------------------------|-------------------------|---------------------------------------------------------------|
| Mild                                                               | $SpO_2 \geq 96\%$       | Absence of respiratory symptoms<br>Only coughing; no dyspnea  |
| Moderate I<br>(Patient does not experience<br>respiratory failure) | $93\% < SpO_2 < 96\%$   | Dyspnea and confirmation of pneumonia                         |
| Moderate II<br>(Patient experiences respiratory<br>failure)        | $SpO_2 \leq 93\%$       | Oxygen therapy necessary                                      |
| Severe                                                             | —                       | ICU admission or mechanical ventilator treatment<br>necessary |

Table S2. List of ADRs

| ADR                                                  | Patients reported the event |        | Number of events |
|------------------------------------------------------|-----------------------------|--------|------------------|
|                                                      | n                           | (%)    |                  |
| Total                                                | 68                          | (6.60) | 78               |
| Infections and infestations                          | 2                           | (0.19) | 2                |
| Pneumonia                                            | 1                           | (0.10) | 1                |
| COVID-19                                             | 1                           | (0.10) | 1                |
| Blood and lymphatic system disorders                 | 1                           | (0.10) | 1                |
| Anaemia                                              | 1                           | (0.10) | 1                |
| Metabolism and nutrition disorders                   | 3                           | (0.29) | 3                |
| Hypokalaemia                                         | 1                           | (0.10) | 1                |
| Decreased appetite                                   | 2                           | (0.19) | 2                |
| Nervous system disorders                             | 12                          | (1.16) | 12               |
| Dizziness                                            | 5                           | (0.48) | 5                |
| Dizziness postural                                   | 1                           | (0.10) | 1                |
| Headache                                             | 3                           | (0.29) | 3                |
| Hypoaesthesia                                        | 1                           | (0.10) | 1                |
| Somnolence                                           | 1                           | (0.10) | 1                |
| Taste disorder                                       | 1                           | (0.10) | 1                |
| Respiratory, thoracic and mediastinal disorders      | 1                           | (0.10) | 1                |
| Interstitial lung disease                            | 1                           | (0.10) | 1                |
| Gastrointestinal disorders                           | 33                          | (3.20) | 36               |
| Abdominal pain upper                                 | 1                           | (0.10) | 1                |
| Diarrhoea                                            | 26                          | (2.52) | 26               |
| Nausea                                               | 2                           | (0.19) | 2                |
| Vomiting                                             | 3                           | (0.29) | 3                |
| Faeces soft                                          | 4                           | (0.39) | 4                |
| Hepatobiliary disorders                              | 1                           | (0.10) | 1                |
| Hepatic function abnormal                            | 1                           | (0.10) | 1                |
| Skin and subcutaneous tissue disorders               | 12                          | (1.16) | 13               |
| Dermatitis allergic                                  | 1                           | (0.10) | 1                |
| Drug eruption                                        | 2                           | (0.19) | 2                |
| Eczema                                               | 1                           | (0.10) | 1                |
| Rash                                                 | 6                           | (0.58) | 6                |
| Skin exfoliation                                     | 1                           | (0.10) | 1                |
| Urticaria                                            | 2                           | (0.19) | 2                |
| General disorders and administration site conditions | 1                           | (0.10) | 1                |
| Hypothermia                                          | 1                           | (0.10) | 1                |
| Investigations                                       | 6                           | (0.58) | 8                |
| Blood uric acid increased                            | 1                           | (0.10) | 1                |
| Full blood count abnormal                            | 1                           | (0.10) | 1                |
| Platelet count decreased                             | 1                           | (0.10) | 1                |
| White blood cell count decreased                     | 2                           | (0.19) | 2                |
| White blood cell count increased                     | 1                           | (0.10) | 1                |
| Hepatic enzyme increased                             | 2                           | (0.19) | 2                |

MedDRA/J version(25.0)

ADR: adverse drug reaction

Table S3. Use of oxygen administration and mechanical ventilation in the effectiveness analysis set (n=884)

| Variables                                                                                       | n   | (%)     |
|-------------------------------------------------------------------------------------------------|-----|---------|
| <b>Oxygen administration</b>                                                                    |     |         |
| No                                                                                              | 849 | (96.04) |
| Yes                                                                                             | 35  | (3.96)  |
| Started after the start of molnupiravir administration                                          | 12  | (1.36)  |
| Volume of oxygen administration <sup>a</sup> (L/min), med (min, max)                            | 2   | (1, 15) |
| <b>Oxygen administration started after the start of molnupiravir administration<sup>b</sup></b> |     |         |
| Nasal cannula                                                                                   | 9   | (1.02)  |
| Oxygen mask                                                                                     | 4   | (0.45)  |
| Nasal high flow                                                                                 | 0   | (0.00)  |
| Mask with reservoir                                                                             | 1   | (0.11)  |
| Other                                                                                           | 0   | (0.00)  |
| <b>Mechanical ventilation started after the start of molnupiravir administration</b>            |     |         |
| No                                                                                              | 883 | (99.89) |
| Yes                                                                                             | 1   | (0.11)  |
| Started after the start of molnupiravir administration                                          | 0   | (0.00)  |

<sup>a</sup> Based on 10 patients with the data available

<sup>b</sup> Including duplicate count
